# Supplementary material for: Efficient total analyses for bromine type flame retardants by simple NICI-GC/MS
Source: Royal Society of Chemistry journal article supplement (doi:10.1039/c2ay25983d), 2012-11-14
Supplement: c2ay25983d.pdf [file c2ay25983d.pdf]

## Supplementary data

# Efficient Total Analyses for Bromine Type Flame Retardants by Simple NICI-GC/MS

Atsushi Kobayashi <sup>a,b</sup>, Tomoyuki Sato <sup>b</sup>, Yusuke Kitahara <sup>b</sup>, Shinichiro Amita <sup>b</sup>,  
Masahiro Mori <sup>b</sup>, Shigeru Suzuki <sup>b</sup>, Takuya Kubo <sup>c,\*</sup>, Koji Otsuka, <sup>c</sup> Ken Hosoya <sup>d</sup>

<sup>a</sup> *Graduate School of Environmental Studies, Tohoku University, Aoba 6-6-20, Aramaki,  
Aobaku, Sendai 9808579, Japan*

<sup>b</sup> *Tohoku Ryokka Kannkyohozen Company, Ltd., Minamiyoshinari 6-6-3, Aobaku,  
Sendai 9850842, Japan*

<sup>c</sup> *Graduate School of Engineering, Kyoto University, Katsura, Nishikyo-ku, Kyoto  
6158510, Japan*

<sup>d</sup> *Graduate School of Life and Environmental Sciences, Kyoto Prefectural University,  
Hangicho 1-5, Shimogamo, Sakyo-ku, Kyoto 6068522, Japan*

### Table of contents

**Experimental procedures of standard samples by 44% sulfuric acid-impregnated silica gel.**

**Figure S1. Fractionation results by 44% sulfuric acid-impregnated silica gel.**

Fraction 1, hexane; 2, CH<sub>2</sub>Cl<sub>2</sub>/Hex (5/95); 3, CH<sub>2</sub>Cl<sub>2</sub>/Hex (10/90); 4, CH<sub>2</sub>Cl<sub>2</sub>/Hex (20/80); 5, CH<sub>2</sub>Cl<sub>2</sub>/Hex (50/50).

### Experimental procedures of standard samples by 44% sulfuric acid-impregnated silica gel.

2.0 g of 44% sulfuric acid-impregnated silica gel was packed into glass column (10 mm i.d.) with *n*-hexane. 100  $\mu$ L of mixture of HBB,  $\alpha$ -HBCB, DBDE, TBBPA (*n*-hexane solution, 1.0 ppm in each) was applied to the column, then, hexane(Hex), CH<sub>2</sub>Cl<sub>2</sub>/Hex (5/95), CH<sub>2</sub>Cl<sub>2</sub>/Hex (10/90), CH<sub>2</sub>Cl<sub>2</sub>/Hex (20/80), CH<sub>2</sub>Cl<sub>2</sub>/Hex (50/50) was eluted the column as 10 mL fraction. Each fraction was purged with N<sub>2</sub> gas, 100  $\mu$ L PCB#209 solution (500 ppb) was syringe spiked. Finally, the total volume of each sample was adjusted at 1.0 mL and GC/MS analyses were carried out. The fractionation results are summarized in Figure S1. HBB,  $\alpha$ -HBCB, and DBDE can be eluted at first fraction treated by *n*-hexane. On the other hand, TBBPA was eluted at fourth fraction treated by CH<sub>2</sub>Cl<sub>2</sub>/Hex (20/80) because of its polarity. Therefore, when we use the fractionation method, CH<sub>2</sub>Cl<sub>2</sub>/Hex (20/80) was utilized for an elution solvent.

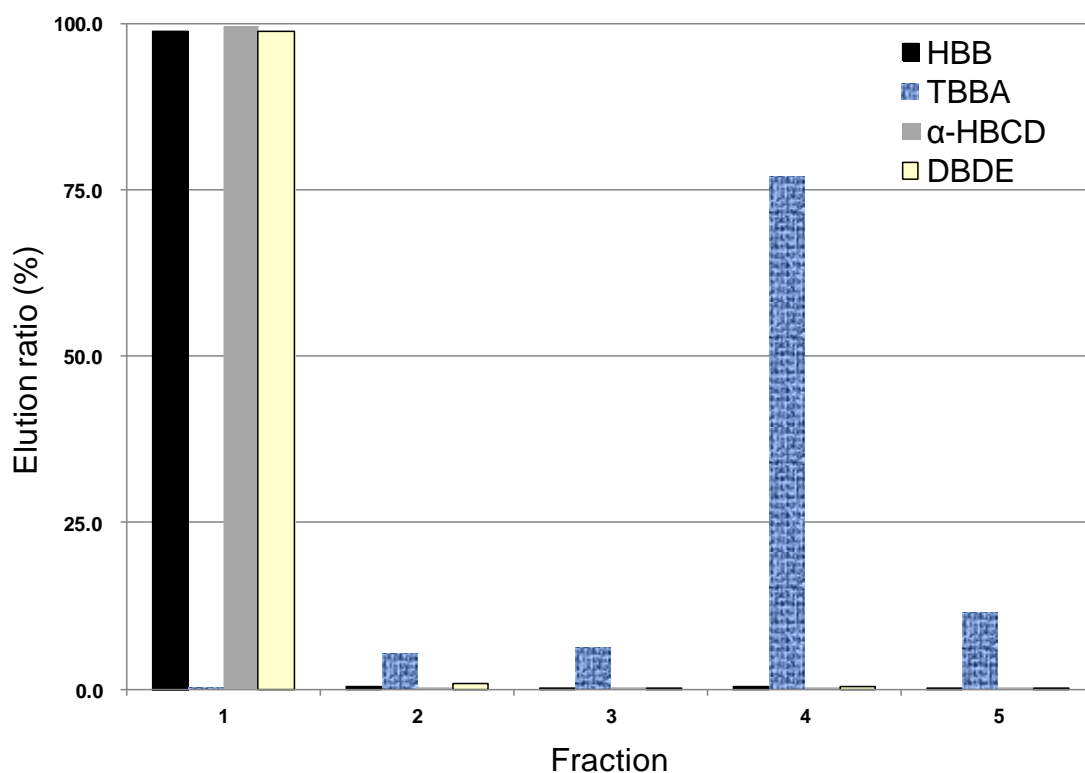

Figure S1. Fractionation results by 44% sulfuric acid-impregnated silica gel
